# Supplementary material for: Tunable thermal conductivities of graphene and graphyne under in-plane torsion
Source: Royal Society of Chemistry journal article supplement (doi:10.1039/c7ra11128b), 2017-01-01
Supplement: c7ra11128b1.pdf [file c7ra11128b1.pdf]

## Supplementary Information

### Tunable thermal conductivities of two dimensional nanomaterials under in-plane torsion

Yinfeng Li<sup>1,2,\*</sup>, Qianling Lin<sup>1</sup>, Ye Li<sup>2</sup>, Daxiang Cui<sup>3</sup>

<sup>1</sup> Department of Engineering Mechanics, School of Naval Architecture, Ocean and Civil Engineering (State Key Laboratory of Ocean Engineering), Shanghai Jiao Tong University, Shanghai 200240, China

<sup>2</sup> Collaborative Innovation Center for Advanced Ship and Deep-Sea Exploration, Shanghai 200240, China.

<sup>3</sup> Institute of Nano Biomedicine and Engineering, Key Laboratory for Thin Film and Microfabrication Technology of the Ministry of Education, Department of Instrument Science and Engineering, School of Electronic Information and Electrical Engineering, Shanghai Jiao Tong University, Shanghai 200240, China

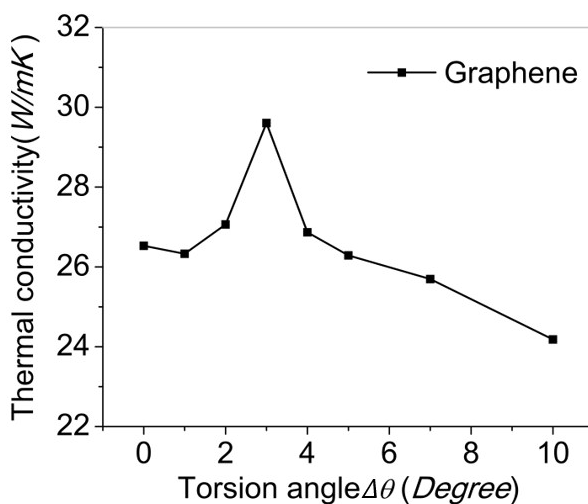

**Fig. S1.** Evolution of the radial thermal conductivities of graphene as a function of torsion angle with time step  $\tau=0.5$  fs. The fixed temperatures in hot and cold regions are 350K and 310K, respectively.

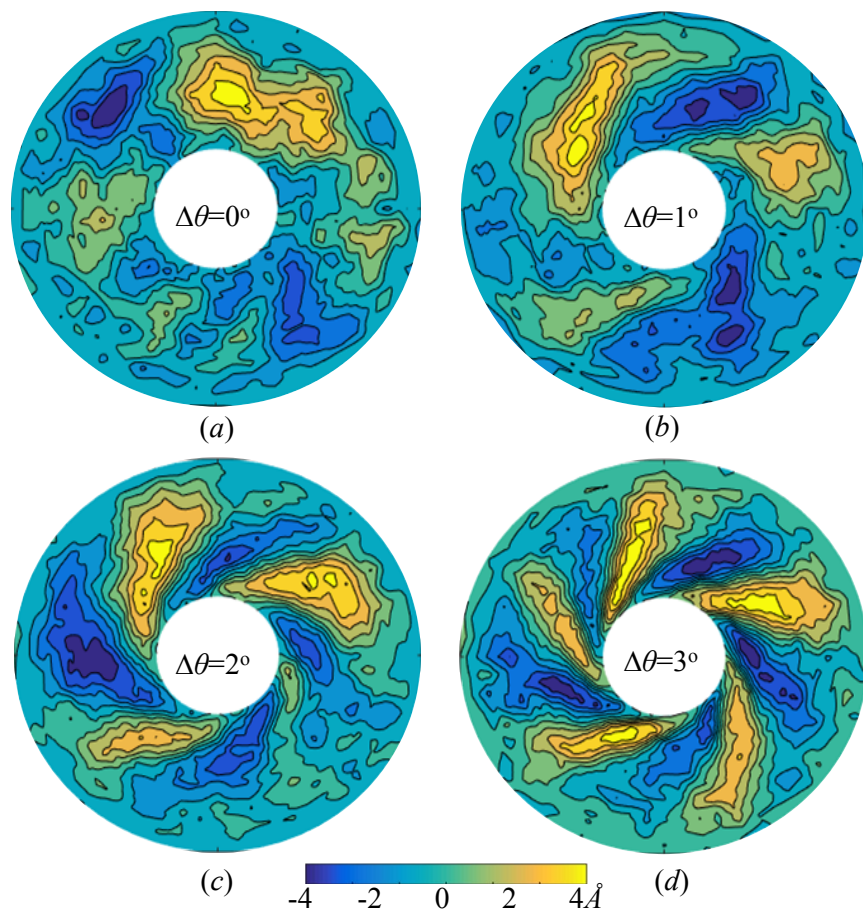

**Fig. S2 Evolution of the surface morphology with the increase of torsion angle for graphyne annulus with  $R_i=3nm$  and  $R_o=10nm$ . (a-d) Contour maps of circular graphyne annulus with torsion angle  $\Delta\theta$  ranging from  $0^\circ$  to  $3^\circ$ .**

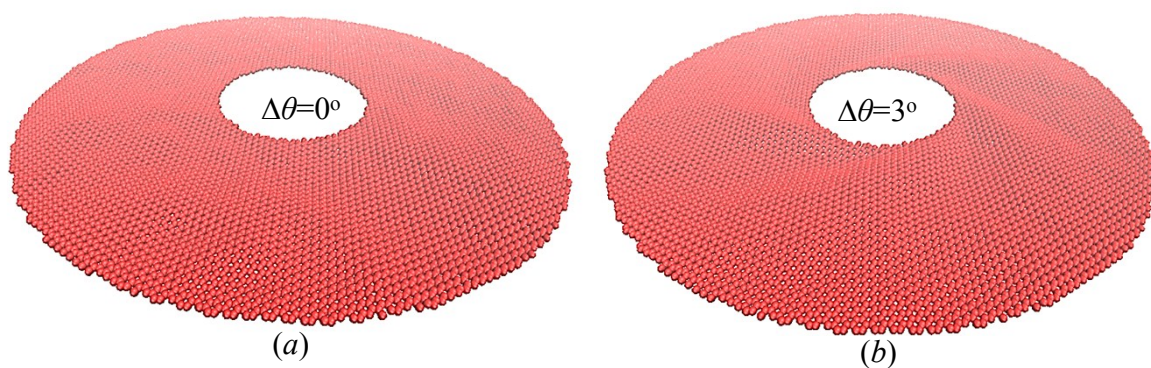

**Fig. S3. Surface morphology of circular graphene annulus under in-plane torsion at (a)  $\Delta\theta=0^\circ$  and (b)  $3^\circ$ , respectively.**

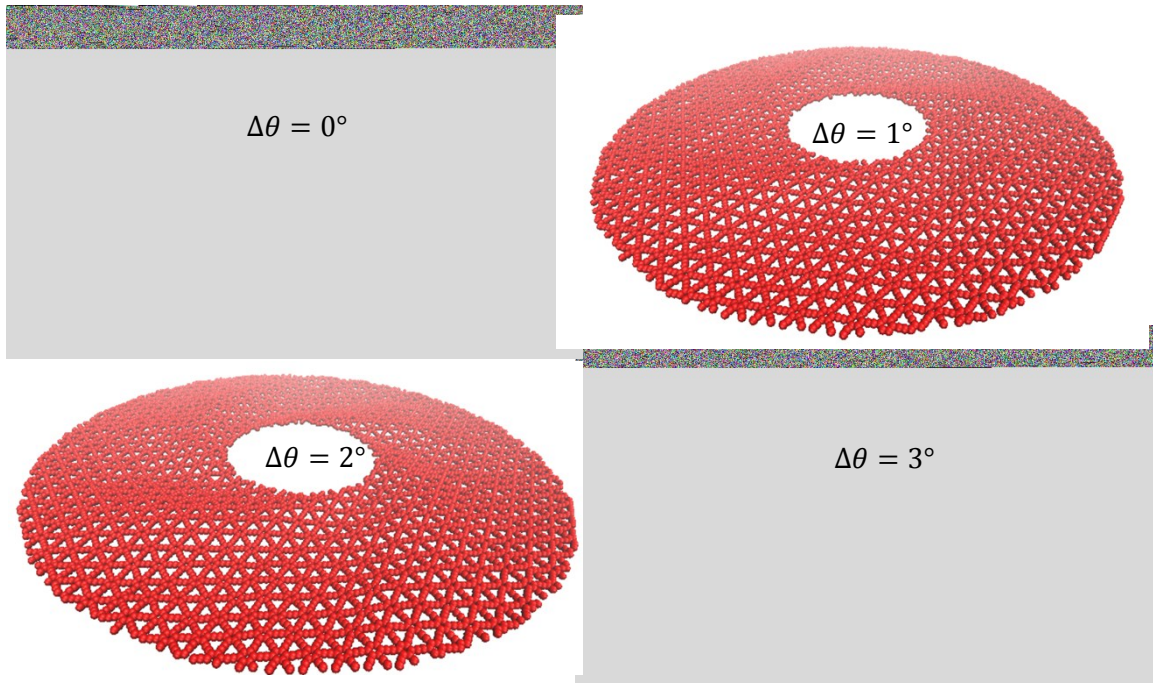

**Fig. S4.** Surface morphology of circular graphyne annulus at in-plane torsion  $\Delta\theta$  varying from  $0^\circ$  to  $3^\circ$ .
